# Supplementary material for: Mesenchymal stem cell-derived microvesicles mediate BMP2 gene delivery and enhance bone regeneration
Source: Royal Society of Chemistry journal article supplement (doi:10.1039/d0tb00422g), 2020-01-01
Supplement: d0tb00422g1.pdf [file d0tb00422g1.pdf]

## Supporting Information

# Mesenchymal stem cells-derived microvesicles mediate *BMP2* gene delivery and enhance bone regeneration

Zhuo Liang,<sup>a,b</sup> Yue Luo<sup>a,b</sup> and Yonggang Lv<sup>\*a,b</sup>

<sup>a</sup> Mechanobiology and Regenerative Medicine Laboratory, Bioengineering College, Chongqing University, Chongqing 400044, P. R. China

<sup>b</sup> Key Laboratory of Biorheological Science and Technology (Chongqing University), Ministry of Education, Bioengineering College, Chongqing University, Chongqing 400044, P. R. China

### \*Corresponding author:

Dr. Yonggang Lv, Professor

Mechanobiology and Regenerative Medicine Laboratory  
Bioengineering College, Chongqing University  
174 Shazheng Street, Shapingba District, Chongqing 400044, China  
Tel: 86-23-65102507  
Fax: 86-23-65102507  
E-mail: yglv@cqu.edu.cn  
Web: www.yglvbme.com

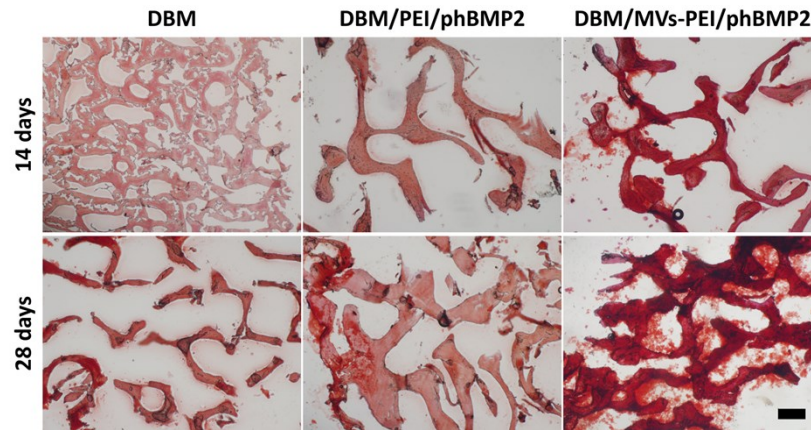

**Fig. S1** Histological assays of the scaffolds after MSCs culture for 14 days and 28 days. Mineral deposition of scaffolds was detected by Alizarin Red S staining. Scale bar, 100  $\mu$ m.

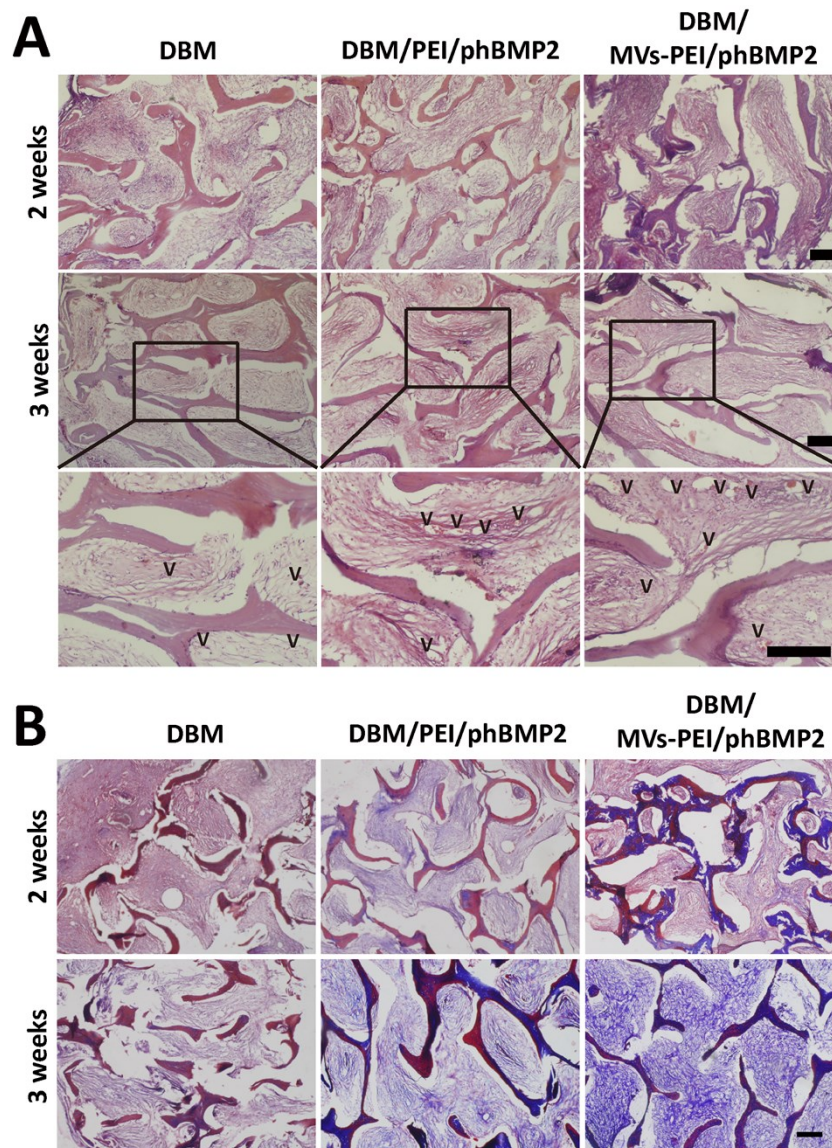

**Fig. S2** Histological examination of the scaffolds after subcutaneous implantation for 2 weeks and 3 weeks. (A) H&E staining. (B) Masson's trichrome staining. V, Vessel. Scale bar, 100  $\mu$ m.

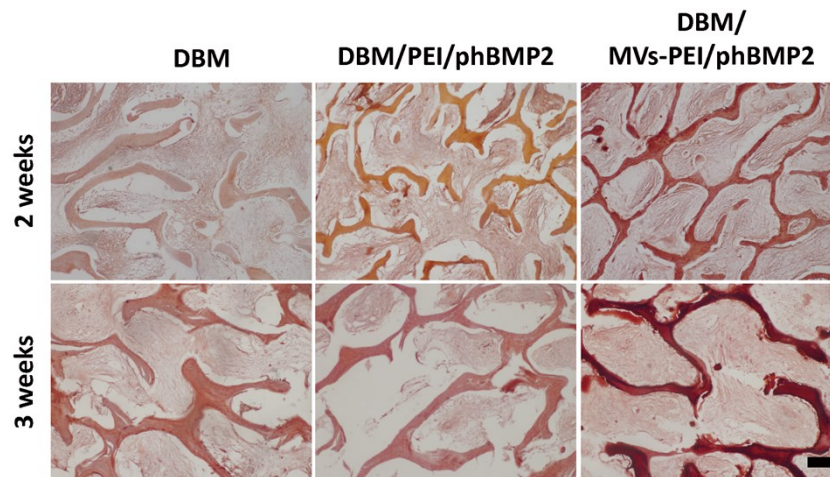

**Fig. S3** The histological image of Alizarin Red S staining of the scaffolds after subcutaneous implantation for 2 weeks and 3 weeks. Scale bar, 100  $\mu$ m.

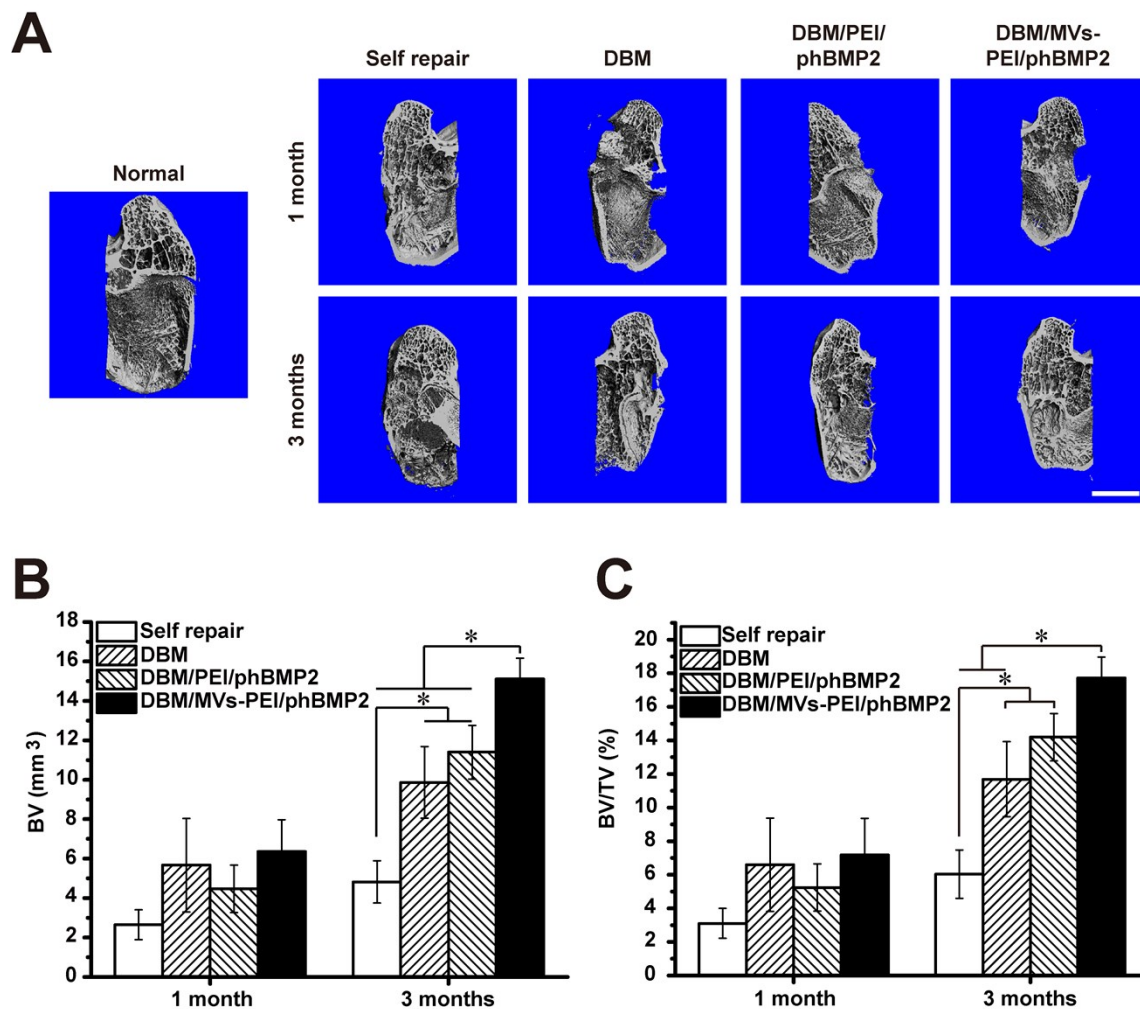

**Fig. S4** Micro-CT evaluation of bone repair in rabbit femoral condyle defect 1 month, 2 months and 3 months post-implantation. (A) Cross-sectional images. Scale bar, 5 mm. (B) Bone volume (BV). (C) Bone volume (BV)/total volume (TV) \*  $p < 0.05$ .
